# Supplementary material
Source: publisher figshare collection journal article supplement (https://sage.figshare.com/ndownloader/files/15367637)
Supplement: Supplementary file 1 [file 15367637]

## Reviewer 2 v1

In spite of limitations, the conclusion may suggest a forward perspective. However, some points should be clarified.

1. As a result, a total of 17 patients were enrolled in this study. The enrollment process should be mentioned more clearly, even part of it can be seen in Method part.
2. The authors described in Discussion part that the lower RICU mortality rate was obtained in this study, compared with published studies (i.e. Reference No 23) with conventional oxygen therapy. However, the difference of other treatments including high-dose corticosteroid therapy among studies should also be considered in the context.
